# Supplementary figures and images for: Nitrogen Supplementation Modulates Morphological, Biochemical, Yield and Quality Attributes of Peppermint
Source: MDPI journal article supplement (doi:10.3390/plants12040809), 2023-02-10

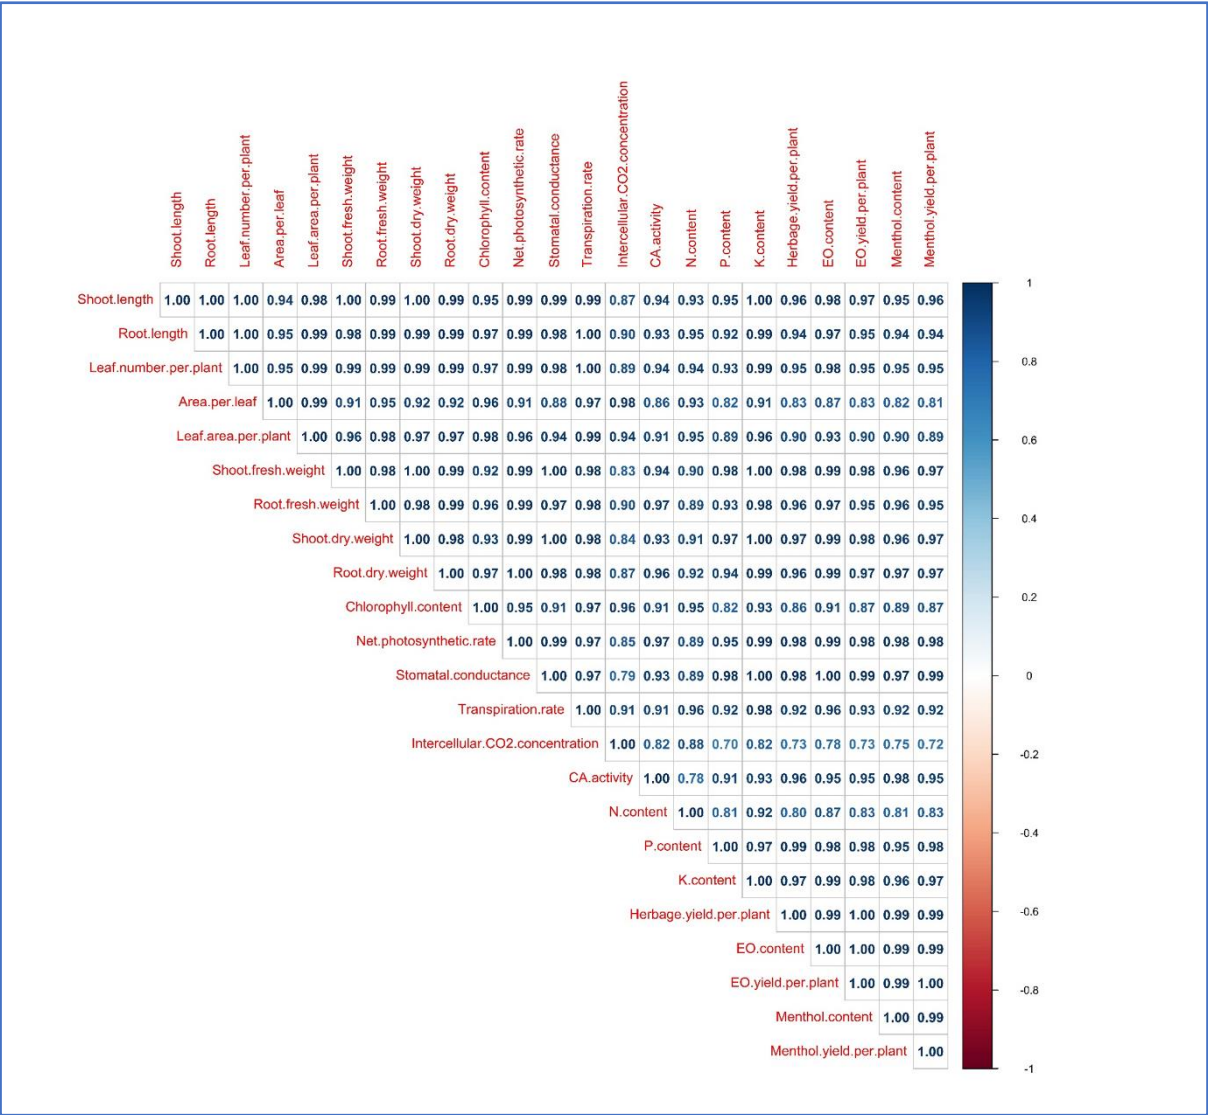

Figure S1.

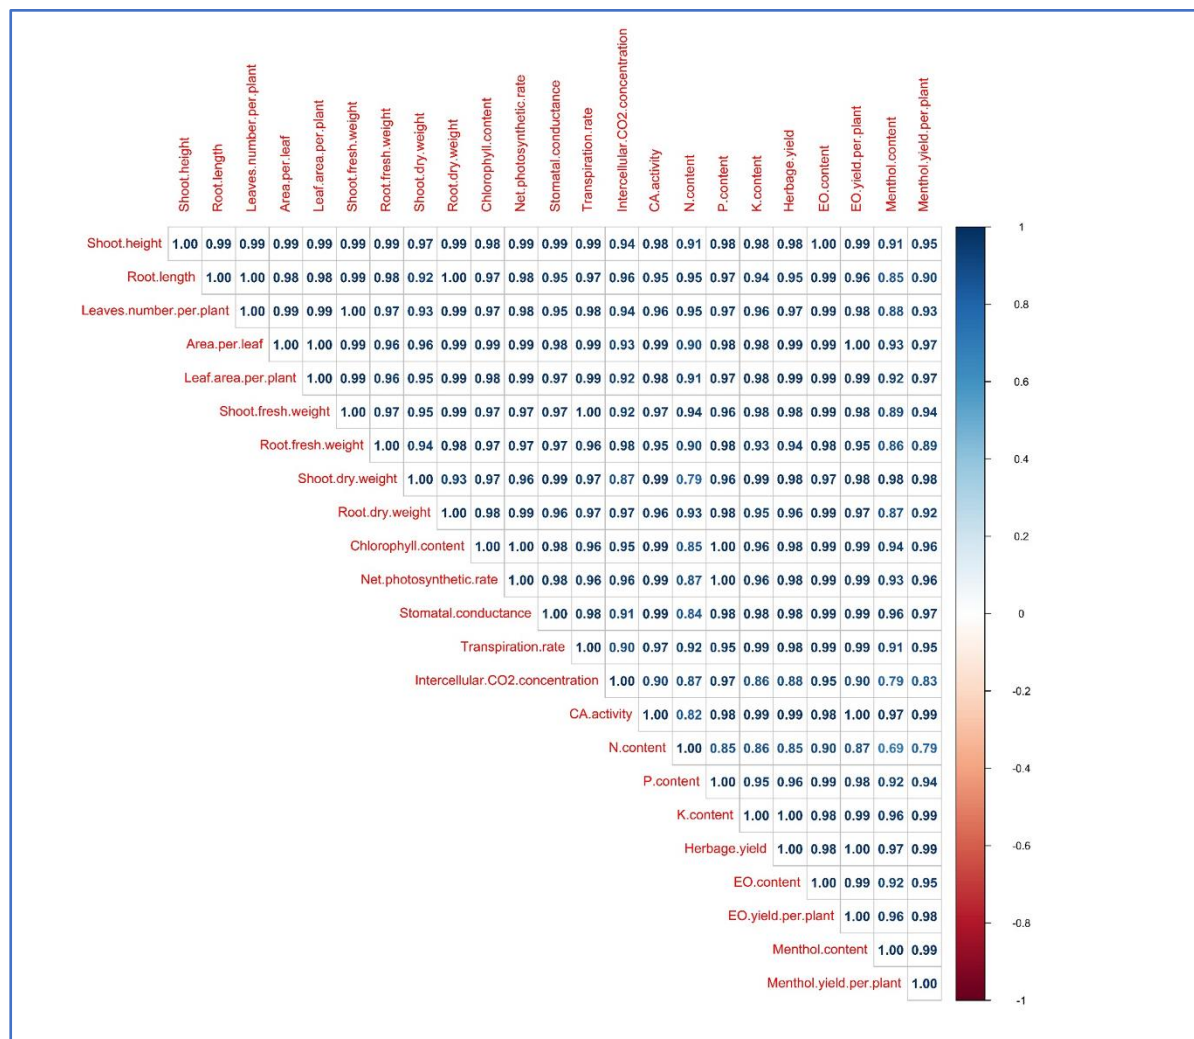

Figure S2.

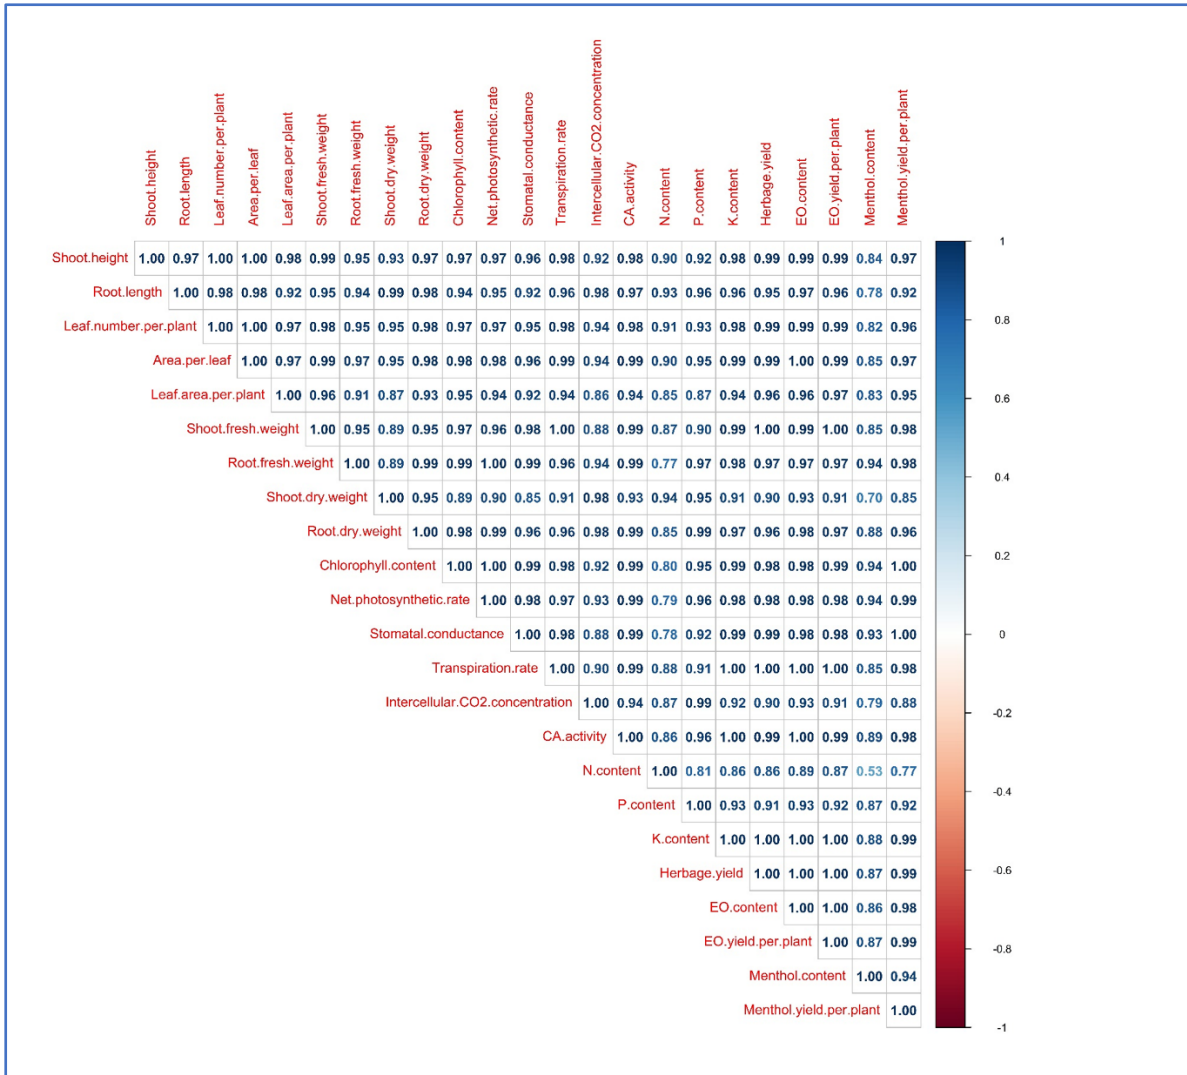

Figure S3.

Supplement: s1 [file s1]
